# Supplementary material for: Spatiotemporal variations in terrestrial biospheric CO 2 fluxes of India derived from MODIS, OCO-2 and TROPOMI satellite observations and a diagnostic terrestrial vegetation model
Source: Copernicus journal article supplement (doi:10.5194/egusphere-2023-817), 2023-05-04
Supplement: Supplementary file 1 [file egusphere-2023-817-supplement.pdf]

## Supplementary Table

**Table S1: List of scalars applied to GOSIF (based on SIF retrievals at 757 nm) on an 8-day time step, specific to each vegetation type. The squared correlation coefficients ( $R^2$ ) between GOSIF and TROPOSIF from 2018 to 2020 across different vegetation classes are also indicated.**

| <b>Vegetation<br/>classification</b> | <b><math>S_{GOSIF}</math><br/>(2018 - 2020)</b> | <b><math>R^2</math> (GOSIF vs<br/>TROPOSIF)<br/>(2018 - 2020)</b> |
|--------------------------------------|-------------------------------------------------|-------------------------------------------------------------------|
| Grassland                            | 2.81                                            | 0.22                                                              |
| Cropland                             | 4.62                                            | 0.45                                                              |
| Savanna                              | 4.35                                            | 0.56                                                              |
| Shrubland                            | 4.35                                            | 0.62                                                              |
| Deciduous forest                     | 4.17                                            | 0.56                                                              |
| Evergreen forest                     | 4.02                                            | 0.52                                                              |

---

Mixed forest

3.94

0.55

---

## Supplementary figures

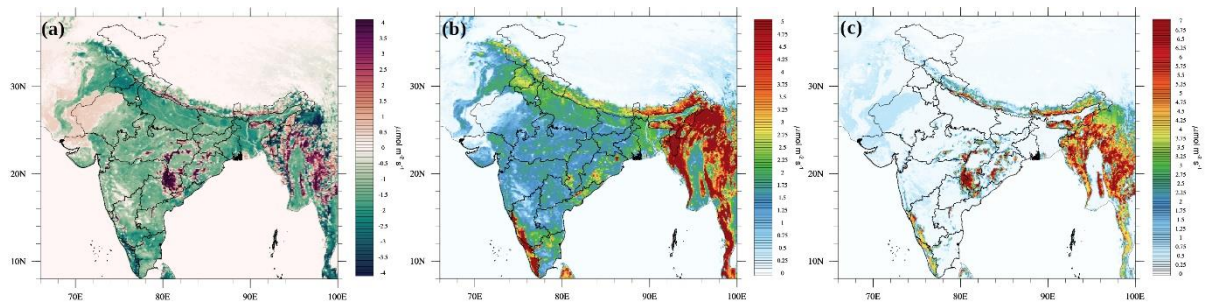

**Fig. S1: Spatial pattern in the standard VPRM simulated annual fluxes of a) NEE, b) GPP and c)  $R_{eco}$  over the domain for 2016.**

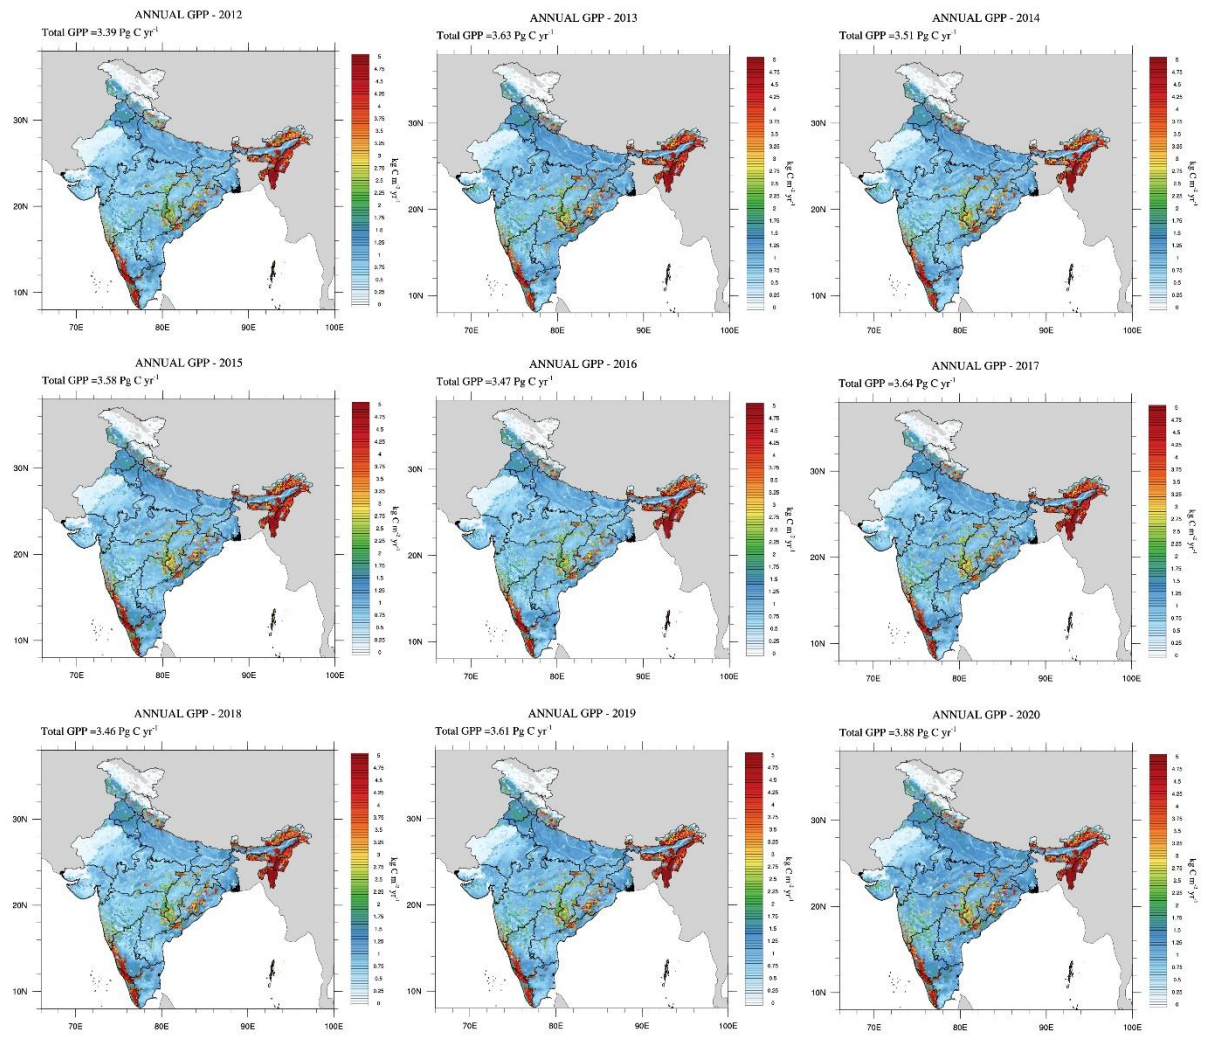

**Fig. S2: Spatial patterns in annual GPP fluxes as simulated by VPRM<sub>TROPOSIF</sub> over the Indian region for the years from 2012 to 2020.**

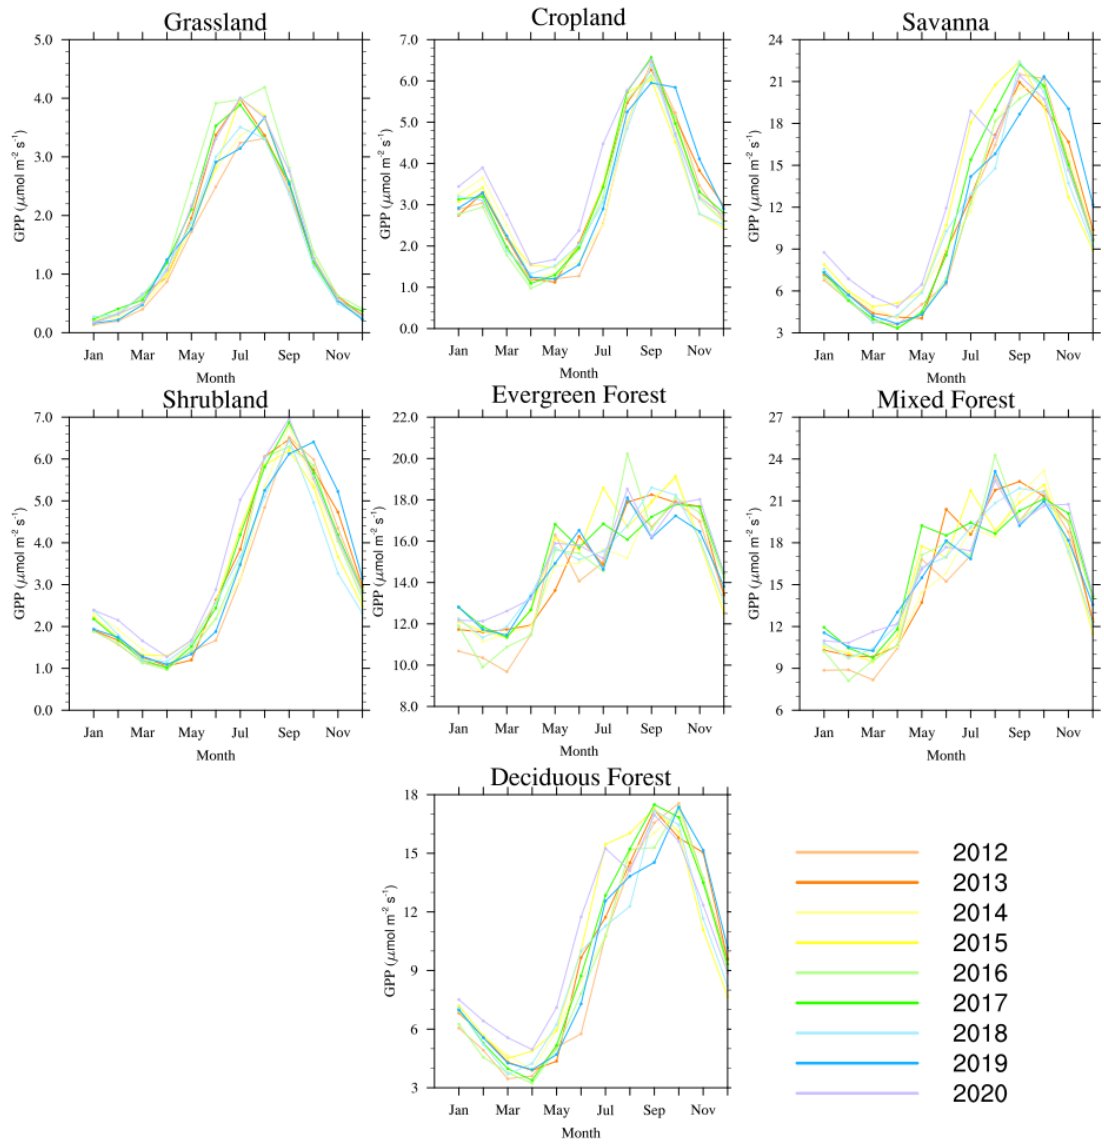

**Fig. S3: Temporal variations in monthly averaged GPP fluxes for the years 2012 to 2020.**
